# Supplementary material for: CsPbBr3 and Cs4PbBr6 perovskite light-emitting diodes using a thermally evaporated host–dopant system
Source: Royal Society of Chemistry journal article supplement (doi:10.1039/d3nr01190a), 2023-01-01
Supplement: d3nr01190a1.pdf [file d3nr01190a1.pdf]

## Supporting Information

### **CsPbBr<sub>3</sub> and Cs<sub>4</sub>PbBr<sub>6</sub> Perovskite Light-Emitting Diodes using Thermally Evaporated Host-Dopant System**

Sa-Rang Bae<sup>+a</sup>, Myeong Jin Seol<sup>+a</sup> and Soo Young Kim<sup>\*a</sup>

<sup>a</sup>Department of Materials Science and Engineering, Korea University, 145 Anam-ro, Seongbuk-gu, Seoul 02841, Republic of Korea

\*E-mail: sooyoungkim@korea.ac.kr

#### Supporting Note

We showed optical properties of perovskites deposited by single-source evaporation and host-dopant system. Also, we showed the device performances according to deposition method and electron transport layer. LEDs fabricated with single-source evaporation show different performance depending on the thickness of perovskite layer, and LEDs fabricated with host-dopant system show different performances according to the percentage of dopant, and electron transport layer.

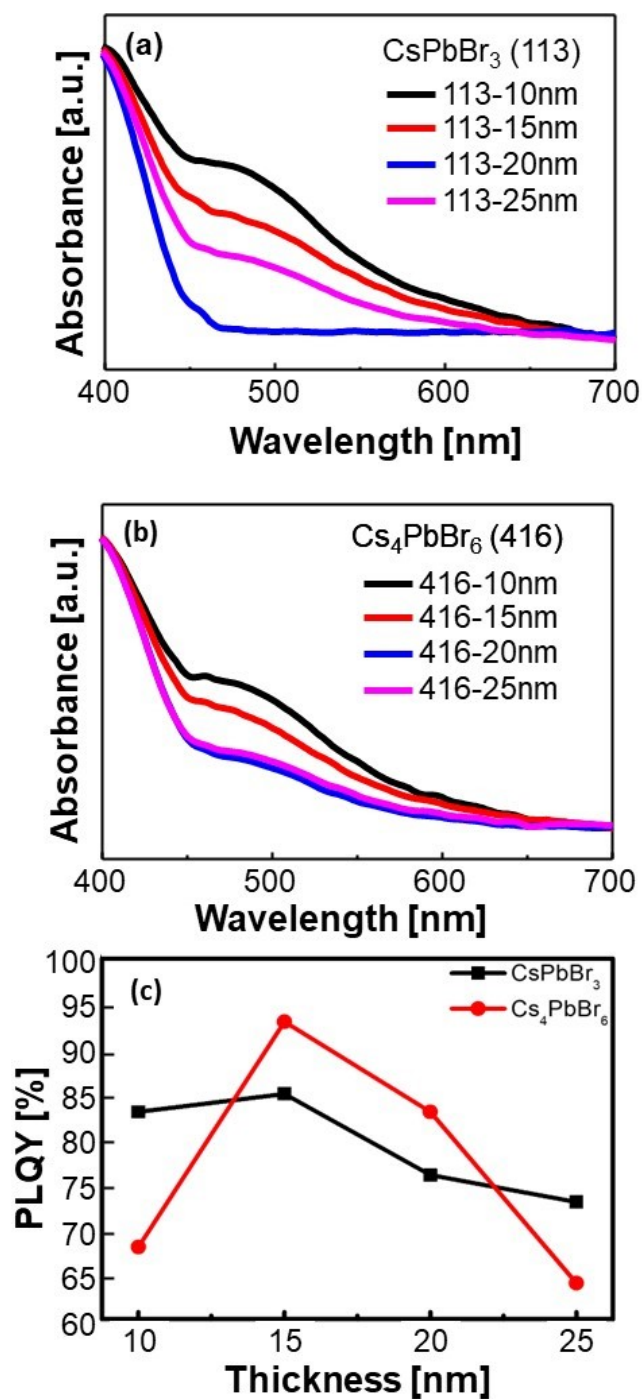

Figure S1. (a) Absorption of CsPbBr<sub>3</sub> (113 structure) perovskite films with different thicknesses. (b) Absorption of Cs<sub>4</sub>PbBr<sub>6</sub> (416 structure) perovskite films with different thicknesses. (c) PLQY with different thicknesses of CsPbBr<sub>3</sub> and Cs<sub>4</sub>PbBr<sub>6</sub> perovskite films.

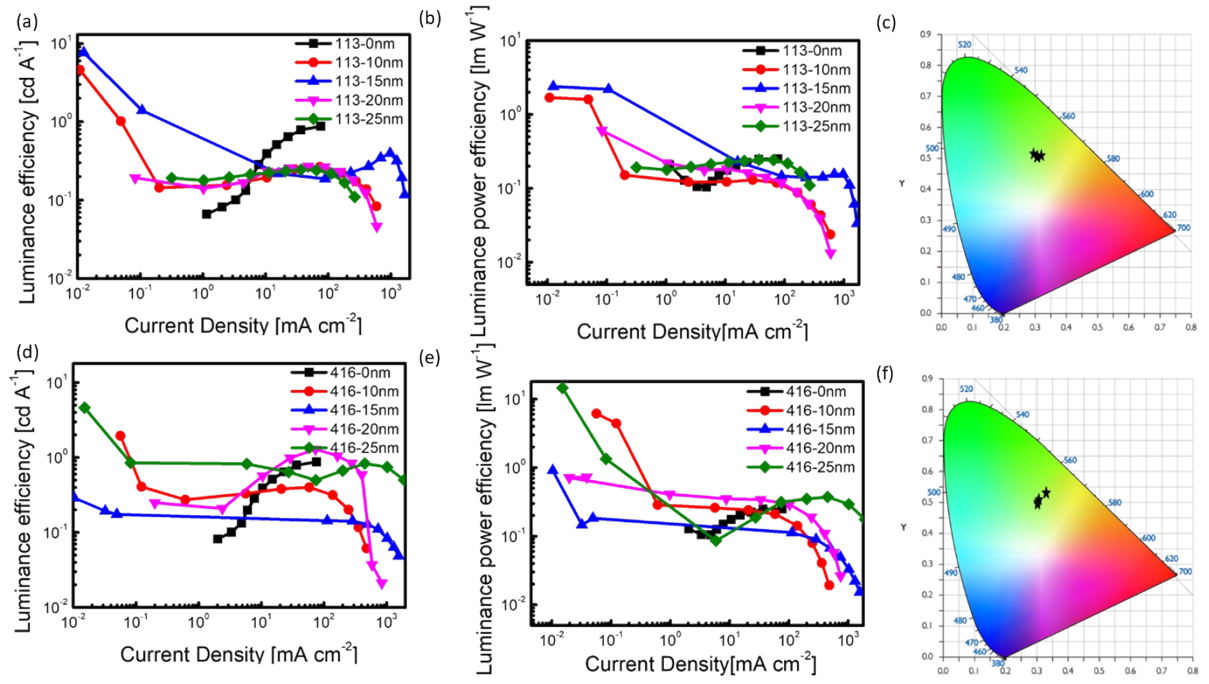

Figure S2. (a) Luminance efficiency as a function of current density, (b) Luminance-power efficiency as a function of current density, and (c) CIE chromaticity diagram of the  $\text{CsPbBr}_3$  (113 structure) PeLEDs. (d) Luminance efficiency as a function of current density, (e) Luminance-power efficiency as a function of current density, and (f) CIE chromaticity diagram of the  $\text{Cs}_4\text{PbBr}_6$  (416 structure) PeLEDs.

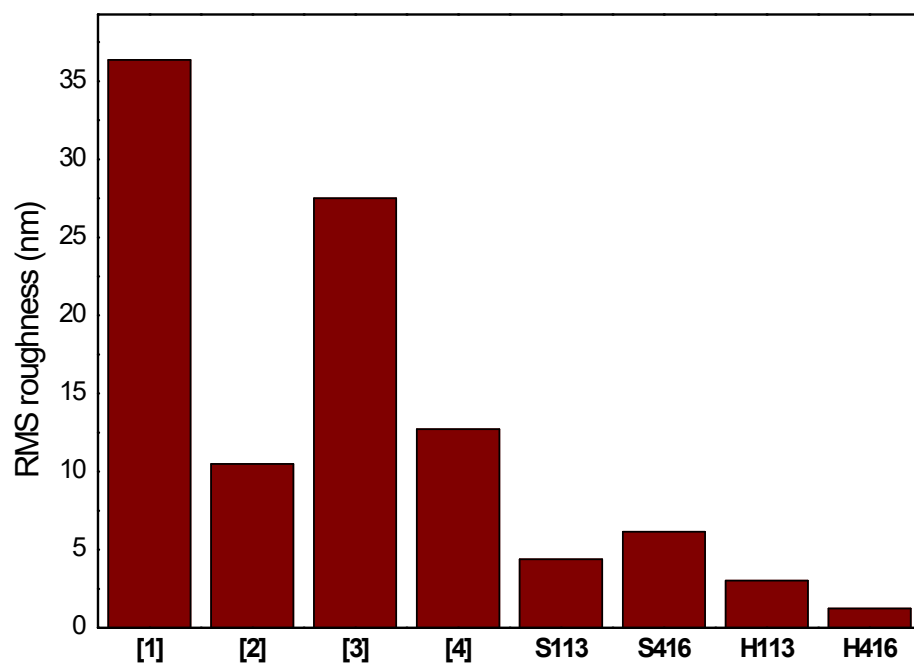

Figure S3. The bar graph that compared root mean square (RMS) roughness of pristine perovskite film. S is single-source evaporation, and H is host-dopant system. 113 is  $\text{CsPbBr}_3$ , and 416 is  $\text{Cs}_4\text{PbBr}_6$ .

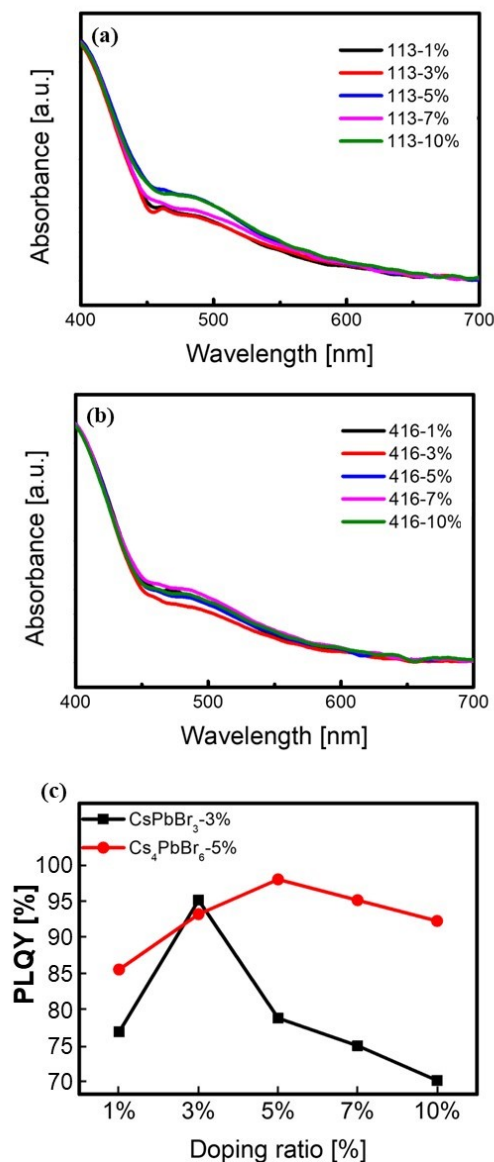

Figure S4 (a) Absorption of doped-CsPbBr<sub>3</sub> (113 structure) perovskite films with different doping ratios. (b) Absorption of doped-Cs<sub>4</sub>PbBr<sub>6</sub> (416 structure) perovskite films with different doping ratios. (c) PLQY with different doping ratios of doped-CsPbBr<sub>3</sub> and -Cs<sub>4</sub>PbBr<sub>6</sub> perovskite films.

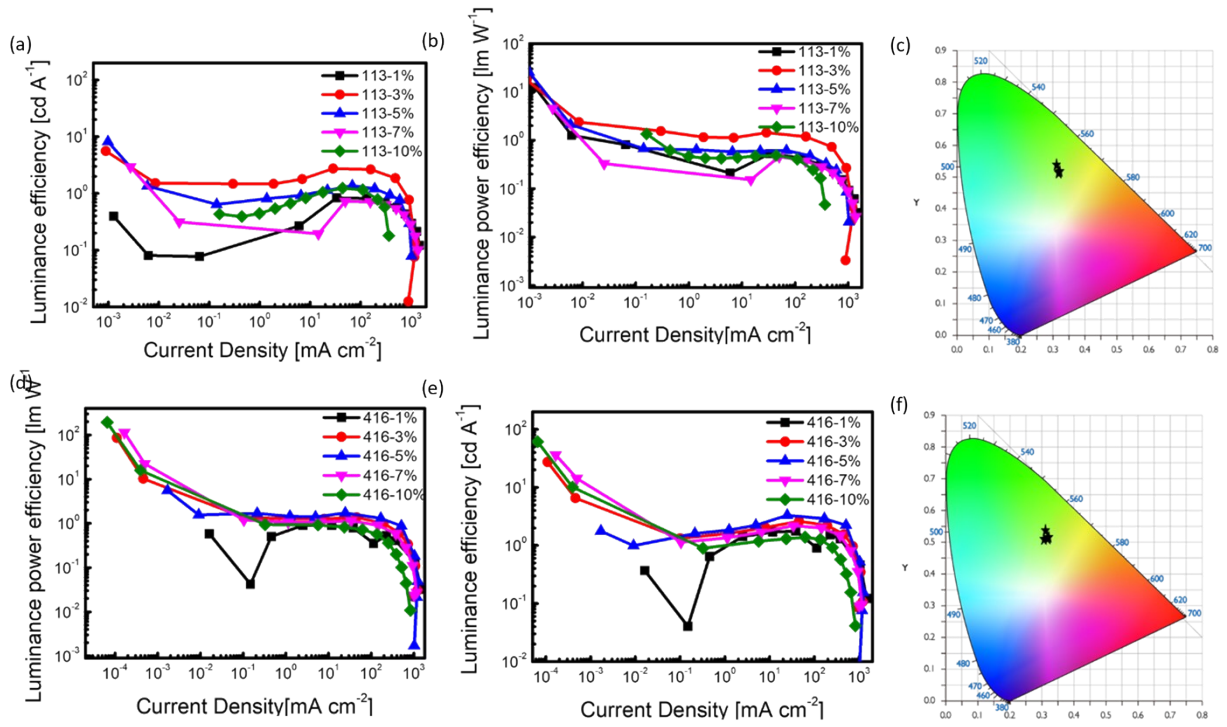

Figure S5. (a) Luminance efficiency as a function of current density, (b) Luminance-power efficiency as a function of current density, and (c) CIE chromaticity diagram of the doped-CsPbBr<sub>3</sub> (113 structure) PeLEDs. (d) Luminance efficiency as a function of current density, (e) Luminance-power efficiency as a function of current density, and (f) CIE chromaticity diagram of the doped-Cs<sub>4</sub>PbBr<sub>6</sub> (416 structure) PeLEDs.

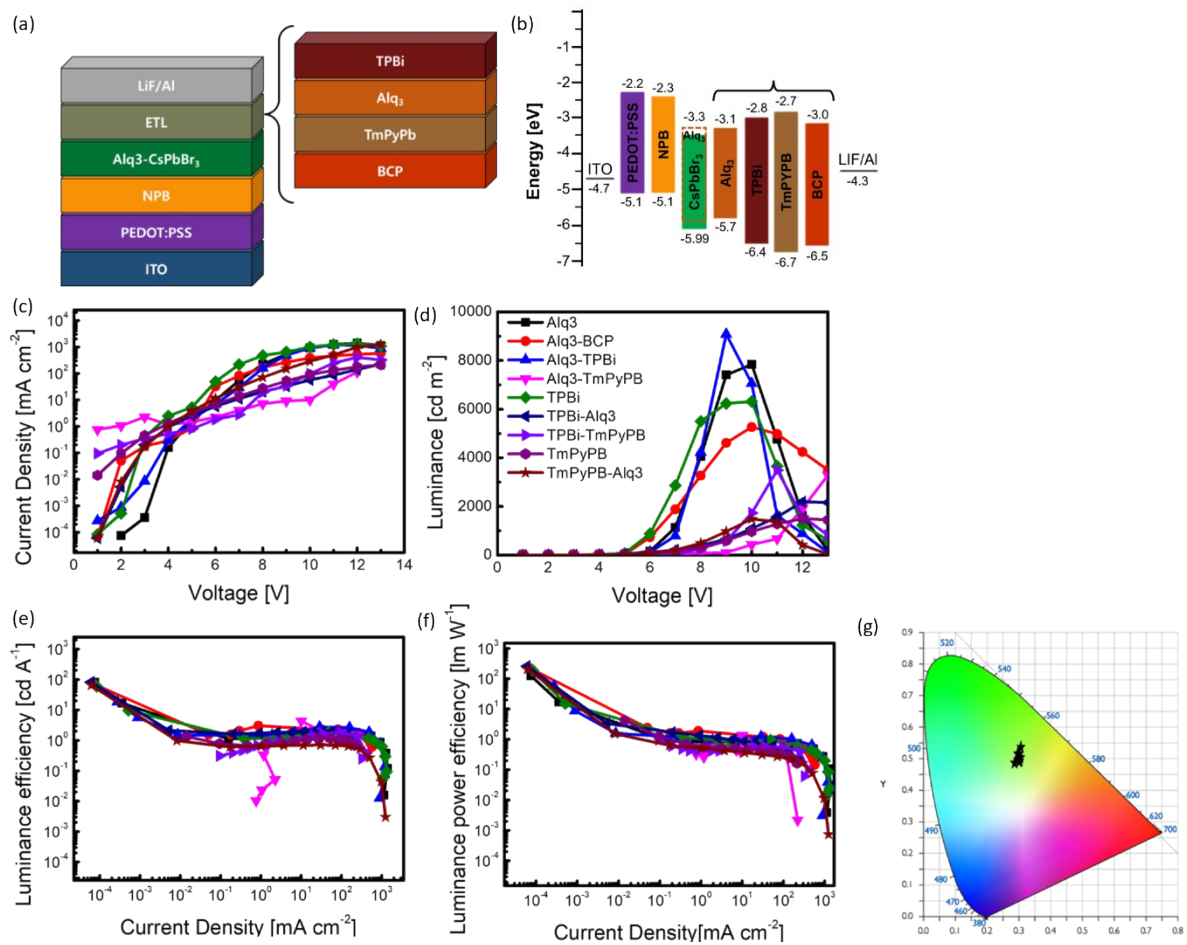

Figure S6. (a) Device structure of 3% doped-CsPbBr<sub>3</sub> PeLED. (b) Energy diagram of 3% doped-CsPbBr<sub>3</sub> PeLED. (c) Current density as a function of driving voltage. (d) Luminance as a function of driving voltage. (e) Luminance efficiency as a function of current density. (f) Luminance-power efficiency as a function of current density. (g) CIE chromaticity diagram of the 3% doped-CsPbBr<sub>3</sub> PeLEDs.

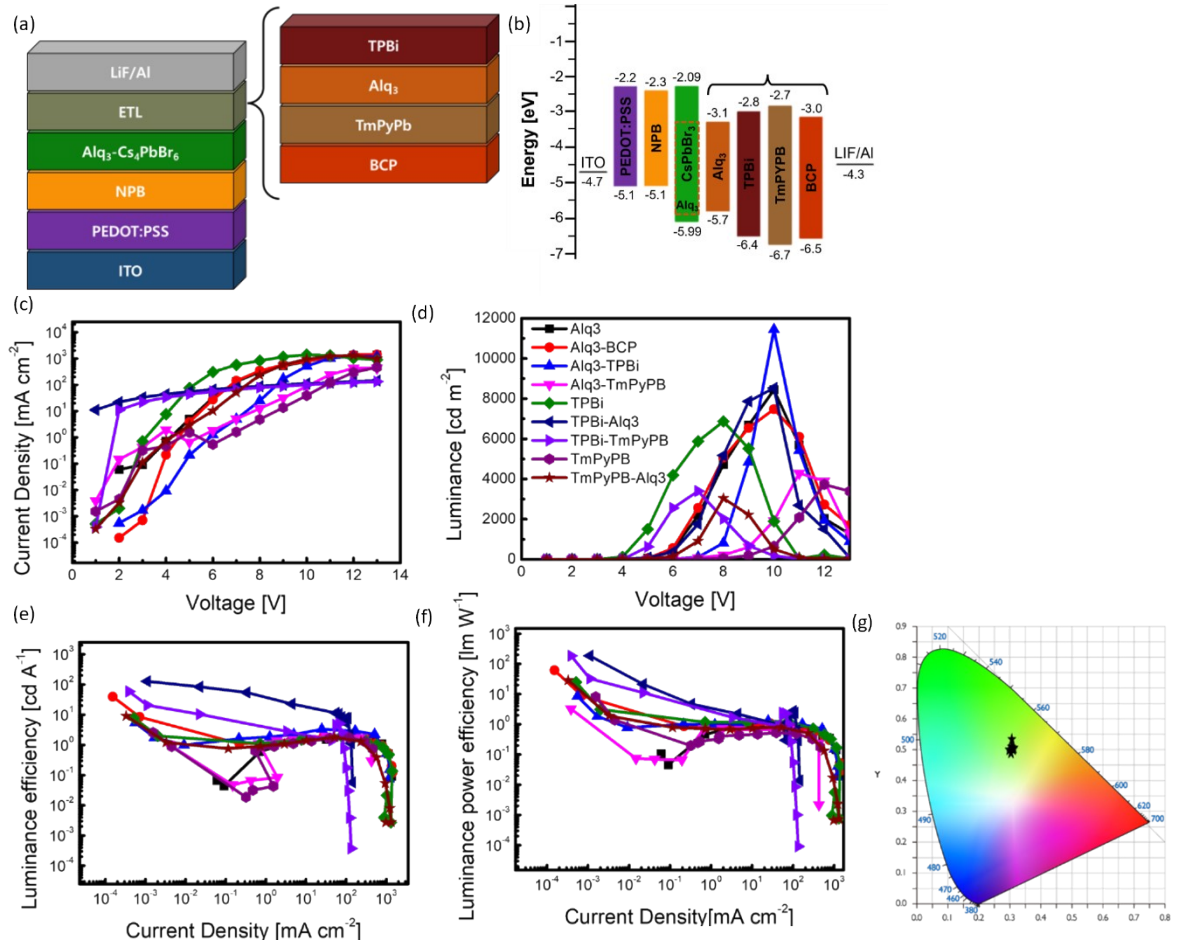

Figure S7. (a) Device structure of 5% doped-Cs<sub>4</sub>PbBr<sub>6</sub> PeLED. (b) Energy diagram of 5% doped-Cs<sub>4</sub>PbBr<sub>6</sub> PeLED. (c) Current density as a function of driving voltage. (d) Luminance as a function of driving voltage. (e) Luminance efficiency as a function of current density. (f) Luminance-power efficiency as a function of current density. (g) CIE chromaticity diagram of the 5% doped-Cs<sub>4</sub>PbBr<sub>6</sub> PeLEDs.

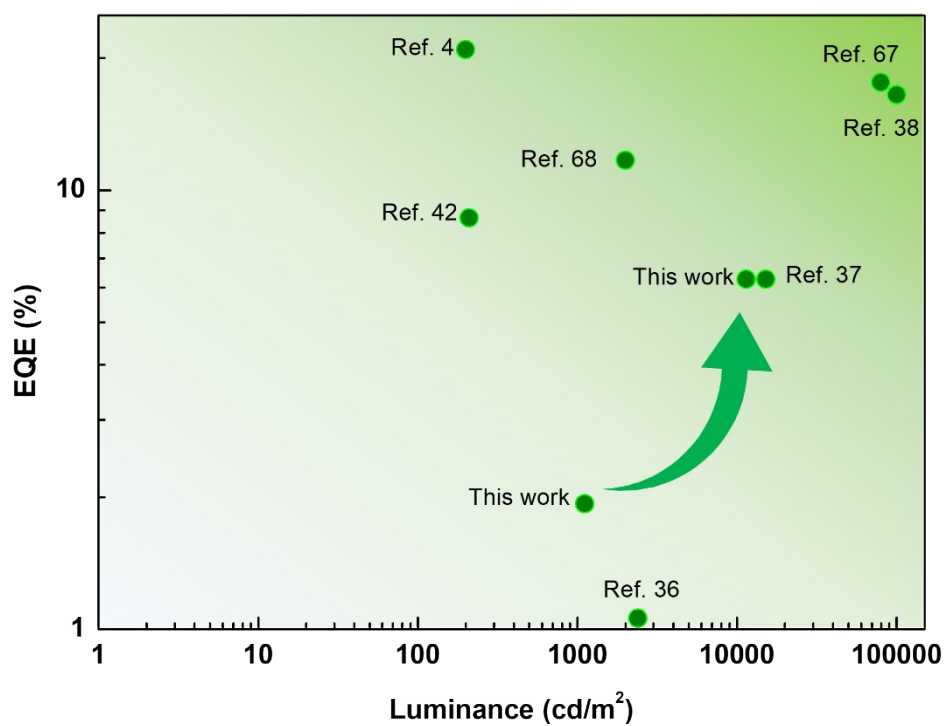

Figure S8. Comparing performance of PeLED fabricated with spin-coating and thermal evaporation by EQE and luminance.

**Table S1.** Absorption, PL peak wavelength, and PLQY corresponding to the different thicknesses of CsPbBr<sub>3</sub> and Cs<sub>4</sub>PbBr<sub>6</sub> films.

| Perovskite                             | Absorbance [nm] | Peak [nm] | PLQY [%] |
|----------------------------------------|-----------------|-----------|----------|
| CsPbBr <sub>3</sub> 10nm               | 530             | 539       | 83       |
| CsPbBr <sub>3</sub> 15nm               | 533             | 543       | 85       |
| CsPbBr <sub>3</sub> 20nm               | 520             | 539       | 76       |
| CsPbBr <sub>3</sub> 25nm               | 520             | 529       | 73       |
| Cs <sub>4</sub> PbBr <sub>6</sub> 10nm | 530             | 537       | 68       |
| Cs <sub>4</sub> PbBr <sub>6</sub> 15nm | 525             | 534       | 93       |
| Cs <sub>4</sub> PbBr <sub>6</sub> 20nm | 522             | 533       | 83       |
| Cs <sub>4</sub> PbBr <sub>6</sub> 25nm | 531             | 540       | 64       |

**Table S2.** Absorption, PL peak wavelength, FWHM, and PLQY corresponding to different doping ratios of CsPbBr<sub>3</sub> and Cs<sub>4</sub>PbBr<sub>6</sub> films.

| Perovskite                            | Absorbance [nm] | Peak [nm] | PLQY [%] |
|---------------------------------------|-----------------|-----------|----------|
| CsPbBr <sub>3</sub> 1%                | 525             | 537       | 77       |
| CsPbBr <sub>3</sub> 3%                | 530             | 541       | 96       |
| CsPbBr <sub>3</sub> 5%                | 538             | 549       | 79       |
| CsPbBr <sub>3</sub> 7%                | 533             | 545       | 75       |
| CsPbBr <sub>3</sub> 10%               | 540             | 548       | 70       |
| Cs <sub>4</sub> PbBr <sub>6</sub> 1%  | 530             | 540       | 86       |
| Cs <sub>4</sub> PbBr <sub>6</sub> 3%  | 529             | 537       | 94       |
| Cs <sub>4</sub> PbBr <sub>6</sub> 5%  | 525             | 533       | 99       |
| Cs <sub>4</sub> PbBr <sub>6</sub> 7%  | 533             | 541       | 96       |
| Cs <sub>4</sub> PbBr <sub>6</sub> 10% | 520             | 527       | 93       |

**Table S3.** Characteristics of 3% doped-CsPbBr<sub>3</sub> PeLED.

| Device                   | V <sub>on</sub><br>[V] | Luminance <sup>max</sup><br>[cd m <sup>-2</sup> ] | Luminance<br>Efficiency <sup>max</sup><br>[cd A <sup>-1</sup> ] | Power<br>Efficiency <sup>max</sup><br>[lm W <sup>-2</sup> ] |
|--------------------------|------------------------|---------------------------------------------------|-----------------------------------------------------------------|-------------------------------------------------------------|
| Alq <sub>3</sub>         | 4.4                    | 7840                                              | 1.37                                                            | 0.71                                                        |
| Alq <sub>3</sub> –BCP    | 4.3                    | 5265                                              | 1.74                                                            | 1.02                                                        |
| Alq <sub>3</sub> –TmPyPb | 4.9                    | 3286                                              | 1.07                                                            | 0.56                                                        |
| Alq <sub>3</sub> –TPBi   | 3.4                    | 9083                                              | 2.73                                                            | 1.43                                                        |
| TmPyPb                   | 4.4                    | 1502                                              | 0.75                                                            | 0.4                                                         |
| TmPyPb–Alq <sub>3</sub>  | 4.3                    | 1486                                              | 0.65                                                            | 0.42                                                        |
| TPBi                     | 3.8                    | 6312                                              | 1.8                                                             | 1.15                                                        |
| TPBi–Alq <sub>3</sub>    | 3.9                    | 2195                                              | 1.73                                                            | 1.14                                                        |
| TPBi–TmPyPb              | 5.3                    | 3488                                              | 0.67                                                            | 0.42                                                        |

Turn-on voltages at 10 cd m<sup>-2</sup>

**Table S4.** Characteristics of 5% doped-Cs<sub>4</sub>PbBr<sub>6</sub> PeLED.

| Device                   | V <sub>on</sub><br>[V] | Luminance <sup>max</sup><br>[cd m <sup>-2</sup> ] | Luminance<br>Efficiency <sup>max</sup><br>[cd A <sup>-1</sup> ] | Power<br>Efficiency <sup>max</sup><br>[lm W <sup>-2</sup> ] |
|--------------------------|------------------------|---------------------------------------------------|-----------------------------------------------------------------|-------------------------------------------------------------|
| Alq <sub>3</sub>         | 4.8                    | 5440                                              | 0.51                                                            | 0.44                                                        |
| Alq <sub>3</sub> –BCP    | 4.6                    | 7474                                              | 0.54                                                            | 0.57                                                        |
| Alq <sub>3</sub> –TmPyPB | 5.2                    | 4292                                              | 0.9                                                             | 0.64                                                        |
| Alq <sub>3</sub> –TPBi   | 3.4                    | 11440                                             | 3.29                                                            | 1.72                                                        |
| TmPyPB                   | 6.1                    | 3729                                              | 0.63                                                            | 0.52                                                        |
| TmPyPB–Alq <sub>3</sub>  | 4.5                    | 3038                                              | 0.75                                                            | 0.52                                                        |
| TPBi                     | 3.8                    | 6866                                              | 0.83                                                            | 0.72                                                        |
| TPBi–Alq <sub>3</sub>    | 3.5                    | 8532                                              | 1.13                                                            | 1.01                                                        |
| TPBi–TmPyPB              | 4.2                    | 3401                                              | 0.77                                                            | 0.26                                                        |

Turn-on voltages at 10 cd m<sup>-2</sup>

## Reference

- [1] X. K. Liu, W. Xu, S. Bai, Y. Jin, J. Wang, R. H. Friend, and F. Gao, *Nat. Mater.*, 2021, **20**, 10–21.
- [2] C. Li, Z. Zang, C. Han, Z. Hu, X. Tang, J. Du, Y. Leng, and K. Sun, *Nano Energy*, 2017, **40**, 195–202.
- [3] C. Y. Huang, S. P. Chang, A. G. Ansay, Z. H. Wang, and C. C. Yang, *Coatings*, 2020, **10**, 336.
- [4] S. M. H. Qaid, B. A. Al-Asbahi, H. M. Ghaithan, M. S. AlSalhi, and A. S. Al dwayyan, *J. Colloid. Interface Sci.*, 2020, **563**, 426–434.
